# Supplementary material for: Role of ureides in source-to-sink transport of photoassimilates in non-fixing soybean
Source: PubMed Central journal article supplement (PMC7475099; doi:10.1093/jxb/eraa146), 2020-03-19

**Table S1.** Primers used for expression analyses.

| Soybean and common bean accessions | Gene name       | Function                            | Forward primer '5-3'<br>Reverse primer '5-3'                          | References                                                              |
|------------------------------------|-----------------|-------------------------------------|-----------------------------------------------------------------------|-------------------------------------------------------------------------|
| Glyma01g07120                      | <i>GmUPS1-1</i> | Ureide permease 1-1                 | GGAGACATCTCTCCAAGGAGGGG<br>AGCAAAGTCCAGCAAAGAATGTTAGAGC               | Collier and Tegeder (2012) The Plant Journal (2012) 72: 355–367.        |
| Glyma02g12970                      | <i>GmUPS1-2</i> | Ureide permease 1-2                 | GGTGATTATAAAAATGGAGACACCTCTTTG<br>GAAGCAAAGTCCAGCAAAGAAAGTTAGAAA      | Collier and Tegeder (2012) The Plant Journal (2012) 72: 355–367.        |
| Glyma02g12980                      | <i>GmUPS1-3</i> | Ureide permease 1-3                 | CCTGTCTTAAACTTACCCAAGTCATCACTG<br>ACAAAACAATGCCCAAAGGTA               | Collier and Tegeder (2012) The Plant Journal (2012) 72: 355–367.        |
| AY461734                           | <i>PvUPS1</i>   | Ureide permease                     | GTAAGCACTTTCTGGGGTGTGTTCTA<br>CTTGGCAGTGTGAGAAGTCTCTG                 | Pélessier et al. (2004) Plant Physiology 134: 664–675.                  |
| Glyma06g11430                      | <i>NIA</i>      | Nitrate reductase                   | TTCATCAGAGGCTATGCGTATTCGG<br>CTTTTCAGGTTGGGTGTTGAGGG                  | Wu et al. (1995) Plant Molecular Biology 29: 491-506.                   |
| Glyma11g33560                      | <i>GS1</i>      | Glutamine synthetase 1              | CTATTCCTCAACAAGAGGCACGC<br>GCCAACACCACAGTAGTATGGACC                   | Morey (2002) Plant Physiology 28: 182-193.                              |
| Glyma03g28410                      | <i>GOGAT</i>    | Glutamate synthase                  | ACACTCTCATCTTCTCTCTCTCTCTCG<br>CGTTGTGGAGGGAAGGGAATG                  | O'Rourke (2014) Annals of Botany 113: 1107-1120.                        |
| Glyma17g33050                      | <i>AAT5</i>     | Aspartate aminotransferase 5        | GCTCAATCTTACAGTAAAAATCTCGGTCTC<br>TTCCAACAACATCGGCAACTATCC            | Wadsworth (1993) Plant Molecular Biology 21: 993–1009.                  |
| Glyma18g06840                      | <i>AS</i>       | Asparagine synthase                 | CTGTATGAGGAGCACGGAGAAAACCTTA<br>TCATCATTCAACCCCTCAATTCAGAG            | Hughes et al. (1997) Plant Molecular Biology 33:301-311.                |
| Glyma14g09510                      | <i>ASPG1a</i>   | Asparaginase                        | GCGCGGCAGCAACATCCACG<br>CTTCACCCGTGCACGATACGCC                        | Pandurangan et al. (2012) Journal of Experimental Botany 63: 3173-3184. |
| Glyma17g35650                      | <i>ASPG1b</i>   | Asparaginase                        | CGGCAGCGACATCCACAGGG<br>CTCGCCCGTGCACGATACACC                         | Pandurangan et al. (2012) Journal of Experimental Botany 63: 3173-3184. |
| Glyma02g02230                      | <i>HIUH</i>     | Hydroxyisourate hydrolase           | TTGGAGAGGATCTGTTTTCAAATGAAGAG<br>GTGACGAATTACTTGCTGTCCGTTGAC          | Raychaudhuri and Tipton (2002) 130:2061-2068.                           |
| Glyma15g07910                      | <i>ALN1</i>     | Allantoinase 1                      | TATCCTACAACCGTGTCAAAGGAAAACTA<br>AAGAACCACAGCACTTAAGAGCCCC            | Duran and Todd (2012) Plant Physiology and Biochemistry 54: 149-155.    |
| Glyma13g31430                      | <i>ALN2</i>     | Allantoinase 2                      | TTACGAAGGACACAAGAAAAGGTGGC<br>GACAAGTCTCAACACTTATGCTGTCAACAT          | Duran and Todd (2012) Plant Physiology and Biochemistry 54: 149-155.    |
| Glyma15g16870                      | <i>AAH</i>      | allantoate amidohydrolase           | GATATACGAGCGATAGATGACCTTGGACG<br>CTTAGATCCGAATCACAATCACAGCAC          | Werner et al. (2008) Plant Physiology 146: 418-430.                     |
| Glyma11g37250                      | <i>UU</i>       | ubiquitous urease                   | AGCATTGGCAAGGCTGGTAGTTC<br>ATTCAGTTTCATGTCTCGTTTGGTGAGC               | Goldraj et al. (2003) Plant Physiology 132:1801–1810.                   |
| Glyma07g01730                      | <i>VSPa</i>     | Vegetative storage protein $\alpha$ | TTAAAGAAGGCTGGCTACCACACATG<br>GGTCTGCTTTCGCTCTGTGG                    | Mason et al. (1988) Plant Molecular Biology 11: 845–856.                |
| Glyma08g21410                      | <i>VSPb</i>     | Vegetative storage protein $\beta$  | GGCATAGATAACACCGTACTCTCTAATATCCC<br>CCCATTTCATCATATAAGGTTTCATTAAATTCC | Mason et al. (1988) Plant Molecular Biology 11: 845–856.                |
| Glyma18g52780                      | <i>ACT11</i>    | Cytoskeletal Actin                  | CGGTGGTTCTATCTTGGCATC<br>GTCTTTCGCTTCAATAACCCTA                       | Hu et al. (2009) BMC Molecular Biology 10: 93–104.                      |
| Glyma12g05510                      | <i>SKIP16</i>   | SKP1/ASK-interacting protein 16     | CTAATGGCAATTGCAGCTCTC<br>AGATAGGGAATTGTGCAGGT                         | Hu et al. (2009) BMC Molecular Biology 10: 93–104.                      |

**Figure S1.** Representative images of roots from (A to C) three individual plants of wild-type (WT) and *UPS1*-overexpression lines OE1 and OE1. Bars = 5 cm.

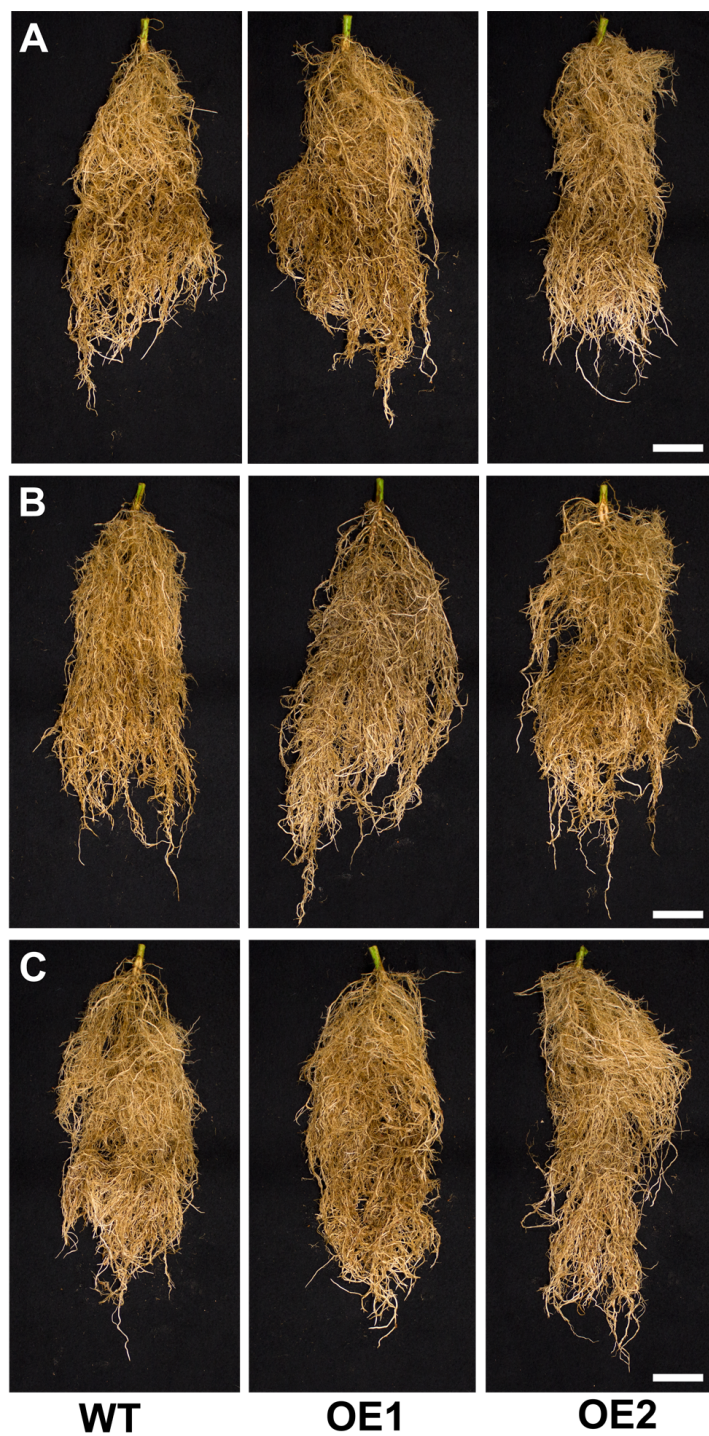

Supplement: eraa146_suppl_supplementary_material.pdf [file eraa146_suppl_supplementary_material.pdf]
